# Supplementary material for: Enhanced Ruminal Fermentation Parameters and Altered Rumen Bacterial Community Composition by Formulated Rumen Buffer Agents Fed to Dairy Cows with a High-Concentrate Diet
Source: MDPI journal article supplement (doi:10.3390/agriculture11060554), 2021-06-17
Supplement: s1 [file s1]

Archive with 2 entries (2 files):
- Supplementary figure 1.pdf
- Supplementary table.pdf
