# Supplementary material for: Enhanced Ruminal Fermentation Parameters and Altered Rumen Bacterial Community Composition by Formulated Rumen Buffer Agents Fed to Dairy Cows with a High-Concentrate Diet
Source: MDPI journal article supplement (doi:10.3390/agriculture11060554), 2021-06-17
Supplement: s1 [file s1]

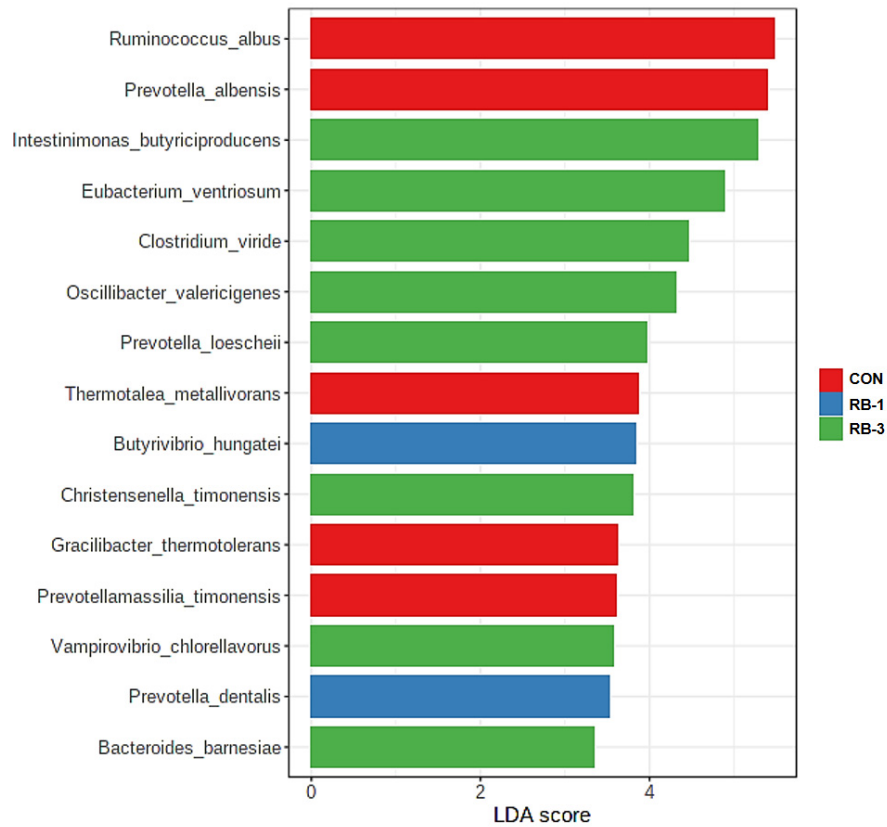

**Figure S1.** Linear discriminant analysis Effect Size (LEfSe) for the influence of treatments on bacterial communities. LefSe package was used to generate the LDA effect size with p value cut-off of 0.2 [43]. The LEfSe plot shows enriched bacterial species associated with the three treatment groups. Five species were enriched in the control group (red), two in RB-1 (blue), and eight in RB-3 (green). The Linear Discriminant Analysis (LDA) score or effect size is shown underneath the bars and each treatment group is indicated by colors on the right side of the figure.
