# Supplementary material for: Enhanced Ruminal Fermentation Parameters and Altered Rumen Bacterial Community Composition by Formulated Rumen Buffer Agents Fed to Dairy Cows with a High-Concentrate Diet
Source: MDPI journal article supplement (doi:10.3390/agriculture11060554), 2021-06-17
Supplement: s1 [file s1]

**Table S1.** Ingredients and chemical composition of experimental concentrate.

| Ingredients <sup>1</sup>            | Percentage (%) |
|-------------------------------------|----------------|
| Corn fine                           | 31.17          |
| Corn gluten feed                    | 21.00          |
| Soy hulls                           | 13.00          |
| Wheat fine                          | 10.00          |
| Rice bran                           | 5.00           |
| Wheat flour                         | 5.32           |
| DDGS                                | 3.40           |
| Molasses                            | 3.00           |
| Palm kernel meal                    | 2.14           |
| Limestone fine                      | 1.90           |
| Palm kernel meal (Solvent)          | 1.80           |
| CMS                                 | 1.50           |
| Brown rice                          | 0.45           |
| Salt                                | 0.17           |
| Mineral/Vitamin premix <sup>2</sup> | 0.15           |
| Total                               | 100.00         |
| Calculated nutrients, as fed        |                |
| Crude Protein                       | 13.03          |
| Crude Fat                           | 3.84           |
| Ash                                 | 5.77           |
| NDF                                 | 23.44          |
| Moisture                            | 11.50          |
| Crude Fiber                         | 8.65           |
| Calcium                             | 1.00           |
| Phosphorus                          | 0.48           |
| Ca/P                                | 2.09           |
| Sulfur                              | 0.20           |
| Potassium                           | 0.84           |
| Magnesium                           | 0.24           |
| Sodium                              | 0.21           |
| TDN                                 | 76.44          |

<sup>1</sup>DDGS, dried distillers' grains with solubles; CMS, condensed molasses solubles; NDF, neutral detergent fiber; TDN, total digestible nutrients.

<sup>2</sup>Mineral & vitamin premix contained vit. A 2,650,000 IU, vit. D3 530,000 IU, vit. E 1,050 IU, niacin 10,000 mg, Mn 4,400 mg, Zn 4,400 mg, Fe 13,200 mg, Cu 2,200 mg, iodine 440 mg, and Co, 440 mg/kg of Grobic-DC provided from Bayer Health Care (Leverkusen, Germany).

**Table S2.** Formulated buffer agent treatments for *in vitro* and *in vivo* experiments.

| Treatment | Ingredient (%) |    |    |    | Total (%) |
|-----------|----------------|----|----|----|-----------|
|           | A              | B  | C  | D  |           |
| RB-1      | 30             | 10 | 30 | 30 | 100       |
| RB-2      | 20             | 10 | 30 | 40 | 100       |
| RB-3      | 20             | 10 | 40 | 30 | 100       |

A: calcium oxide; B: processed coral (powdered form); C: magnesium oxide; D: sodium bicarbonate

**Table S3.** Neutralizing and buffering capacity of formulated buffer agent treatments.

| Parameter                      | RB-1               | RB-2               | RB-3               | SEM   | <i>p</i> -value |
|--------------------------------|--------------------|--------------------|--------------------|-------|-----------------|
| initial pH                     | 9.67               | 9.46               | 9.60               | 0.069 | 0.255           |
| Neutralizing capacity (mmol/L) | 21.73              | 14.27              | 20.31              | 2.665 | 0.237           |
| Buffering capacity (mmol/L)    | 42.20 <sup>a</sup> | 30.60 <sup>c</sup> | 35.70 <sup>b</sup> | 0.143 | <0.001          |

RB-1: 30% calcium oxide; 10% processed coral; 30% magnesium oxide; 30% sodium bicarbonate

RB-2: 20% calcium oxide; 10% processed coral; 30% magnesium oxide; 40% sodium bicarbonate

RB-3: 20% calcium oxide; 10% processed coral; 40% magnesium oxide; 30% sodium bicarbonate

**Table S4.** Effect of treatments on *in vitro* rumen fermentation parameters after 0, 6, 12, and 24 h of incubation.

| Parameters                 | Time (h) | Treatment <sup>1</sup> |                      |                      |                      |                      |                      |                      | SEM   | <i>p</i> -value |
|----------------------------|----------|------------------------|----------------------|----------------------|----------------------|----------------------|----------------------|----------------------|-------|-----------------|
|                            |          | CON                    | BEN                  | CC                   | CO                   | SB                   | SS                   | PC                   |       |                 |
| pH                         | 0        | 6.33 <sup>c</sup>      | 6.29 <sup>c</sup>    | 6.28 <sup>c</sup>    | 9.80 <sup>a</sup>    | 6.92 <sup>b</sup>    | 7.05 <sup>b</sup>    | 9.63 <sup>a</sup>    | 0.036 | <0.001          |
|                            | 6        | 5.41 <sup>e</sup>      | 5.64 <sup>d</sup>    | 5.60 <sup>d</sup>    | 6.73 <sup>a</sup>    | 6.29 <sup>b</sup>    | 6.45 <sup>b</sup>    | 6.11 <sup>c</sup>    | 0.034 | <.0001          |
|                            | 12       | 5.34 <sup>d</sup>      | 5.36 <sup>d</sup>    | 5.34 <sup>d</sup>    | 6.16 <sup>a</sup>    | 6.11 <sup>ab</sup>   | 6.03 <sup>b</sup>    | 5.91 <sup>c</sup>    | 0.025 | <.0001          |
|                            | 24       | 5.26 <sup>d</sup>      | 5.27 <sup>d</sup>    | 5.24 <sup>d</sup>    | 6.01 <sup>a</sup>    | 5.56 <sup>c</sup>    | 5.75 <sup>b</sup>    | 5.98 <sup>a</sup>    | 0.023 | <.0001          |
| Total gas (ml)             | 6        | 142.67 <sup>c</sup>    | 138.00 <sup>c</sup>  | 149.00 <sup>c</sup>  | 36.00 <sup>e</sup>   | 258.00 <sup>a</sup>  | 190.33 <sup>b</sup>  | 84.00 <sup>d</sup>   | 7.217 | <0.001          |
|                            | 12       | 165.33 <sup>c</sup>    | 190.33 <sup>b</sup>  | 188.67 <sup>b</sup>  | 129.00 <sup>d</sup>  | 276.00 <sup>a</sup>  | 270.67 <sup>a</sup>  | 175.67 <sup>bc</sup> | 4.244 | <0.001          |
|                            | 24       | 236.00 <sup>d</sup>    | 240.67 <sup>cd</sup> | 313.33 <sup>b</sup>  | 278.00 <sup>bc</sup> | 400.67 <sup>a</sup>  | 394.67 <sup>a</sup>  | 302.67 <sup>b</sup>  | 7.752 | <0.001          |
| NH <sub>3</sub> -N (mg/dL) | 0        | 19.57 <sup>a</sup>     | 15.23 <sup>b</sup>   | 16.48 <sup>b</sup>   | 9.89 <sup>d</sup>    | 11.97 <sup>c</sup>   | 12.23 <sup>c</sup>   | 8.38 <sup>d</sup>    | 0.399 | <0.001          |
|                            | 6        | 21.76 <sup>a</sup>     | 16.73 <sup>c</sup>   | 18.95 <sup>b</sup>   | 18.66 <sup>b</sup>   | 13.77 <sup>d</sup>   | 11.43 <sup>e</sup>   | 14.41 <sup>d</sup>   | 0.403 | <0.001          |
|                            | 12       | 26.02 <sup>a</sup>     | 21.21 <sup>c</sup>   | 23.56 <sup>b</sup>   | 16.00 <sup>d</sup>   | 25.12 <sup>ab</sup>  | 19.26 <sup>c</sup>   | 14.55 <sup>d</sup>   | 0.579 | <0.001          |
|                            | 24       | 22.22 <sup>d</sup>     | 23.38 <sup>cd</sup>  | 24.73 <sup>bc</sup>  | 24.26 <sup>bcd</sup> | 26.19 <sup>b</sup>   | 24.46 <sup>bcd</sup> | 32.11 <sup>a</sup>   | 0.690 | <0.001          |
| Total VFA (mmol/L)         | 0        | 165.67 <sup>ab</sup>   | 151.26 <sup>bc</sup> | 142.82 <sup>c</sup>  | 148.23 <sup>bc</sup> | 187.00 <sup>a</sup>  | 184.27 <sup>a</sup>  | 175.39 <sup>a</sup>  | 5.592 | 0.001           |
|                            | 6        | 207.82 <sup>b</sup>    | 189.93 <sup>c</sup>  | 197.68 <sup>bc</sup> | 191.66 <sup>bc</sup> | 243.21 <sup>a</sup>  | 227.89 <sup>a</sup>  | 228.54 <sup>a</sup>  | 4.774 | <0.001          |
|                            | 12       | 224.10 <sup>c</sup>    | 208.73 <sup>c</sup>  | 221.22 <sup>c</sup>  | 253.05 <sup>b</sup>  | 251.49 <sup>b</sup>  | 273.29 <sup>a</sup>  | 262.83 <sup>ab</sup> | 5.237 | <0.001          |
|                            | 24       | 223.76 <sup>d</sup>    | 219.27 <sup>d</sup>  | 235.80 <sup>d</sup>  | 296.56 <sup>ab</sup> | 278.22 <sup>bc</sup> | 304.72 <sup>a</sup>  | 263.50 <sup>c</sup>  | 5.135 | <0.001          |
| VFA (mmol/L)               |          |                        |                      |                      |                      |                      |                      |                      |       |                 |
| Acetate                    | 0        | 117.85 <sup>a</sup>    | 94.75 <sup>bc</sup>  | 86.57 <sup>cd</sup>  | 72.36 <sup>d</sup>   | 113.17 <sup>a</sup>  | 109.08 <sup>ab</sup> | 92.67 <sup>c</sup>   | 3.961 | <0.001          |
|                            | 6        | 118.52 <sup>cd</sup>   | 115.10 <sup>d</sup>  | 116.87 <sup>d</sup>  | 116.19 <sup>d</sup>  | 132.55 <sup>a</sup>  | 123.17 <sup>bc</sup> | 126.16 <sup>b</sup>  | 1.545 | <0.001          |
|                            | 12       | 120.00 <sup>c</sup>    | 116.75 <sup>c</sup>  | 119.74 <sup>c</sup>  | 130.08 <sup>b</sup>  | 131.40 <sup>ab</sup> | 129.78 <sup>b</sup>  | 135.07 <sup>a</sup>  | 1.243 | <0.001          |
|                            | 24       | 117.28 <sup>c</sup>    | 124.23 <sup>b</sup>  | 124.29 <sup>b</sup>  | 143.03 <sup>a</sup>  | 141.50 <sup>a</sup>  | 145.65 <sup>a</sup>  | 127.35 <sup>b</sup>  | 1.124 | <0.001          |
| Propionate                 | 0        | 31.58 <sup>c</sup>     | 30.86 <sup>c</sup>   | 31.62 <sup>c</sup>   | 59.78 <sup>a</sup>   | 41.75 <sup>b</sup>   | 43.45 <sup>b</sup>   | 66.54 <sup>a</sup>   | 1.684 | <0.001          |
|                            | 6        | 46.60 <sup>b</sup>     | 43.08 <sup>b</sup>   | 43.82 <sup>b</sup>   | 47.02 <sup>b</sup>   | 55.62 <sup>a</sup>   | 51.88 <sup>a</sup>   | 52.46 <sup>a</sup>   | 1.139 | <0.001          |
|                            | 12       | 37.37 <sup>d</sup>     | 44.20 <sup>c</sup>   | 49.33 <sup>bc</sup>  | 57.51 <sup>a</sup>   | 53.07 <sup>ab</sup>  | 56.73 <sup>a</sup>   | 56.90 <sup>a</sup>   | 1.465 | <0.001          |
|                            | 24       | 47.73 <sup>de</sup>    | 46.03 <sup>e</sup>   | 53.51 <sup>cd</sup>  | 66.15 <sup>b</sup>   | 66.83 <sup>b</sup>   | 74.28 <sup>a</sup>   | 55.24 <sup>c</sup>   | 1.708 | <0.001          |
| Butyrate                   | 0        | 16.23 <sup>c</sup>     | 25.64 <sup>ab</sup>  | 24.62 <sup>b</sup>   | 16.09 <sup>c</sup>   | 32.08 <sup>a</sup>   | 31.73 <sup>ab</sup>  | 16.17 <sup>c</sup>   | 1.906 | <0.001          |
|                            | 6        | 42.69 <sup>ab</sup>    | 31.75 <sup>bc</sup>  | 36.99 <sup>bc</sup>  | 28.45 <sup>c</sup>   | 55.05 <sup>a</sup>   | 52.84 <sup>a</sup>   | 49.93 <sup>a</sup>   | 3.535 | 0.001           |
|                            | 12       | 66.73 <sup>b</sup>     | 47.78 <sup>c</sup>   | 52.14 <sup>c</sup>   | 65.47 <sup>b</sup>   | 67.02 <sup>b</sup>   | 86.78 <sup>a</sup>   | 70.86 <sup>b</sup>   | 3.693 | <0.001          |
|                            | 24       | 58.75 <sup>cd</sup>    | 49.01 <sup>d</sup>   | 58.00 <sup>cd</sup>  | 87.38 <sup>a</sup>   | 69.89 <sup>bc</sup>  | 84.79 <sup>a</sup>   | 80.91 <sup>ab</sup>  | 3.056 | <0.001          |
| A/P ratio                  | 0        | 3.73 <sup>a</sup>      | 3.08 <sup>b</sup>    | 2.74 <sup>bc</sup>   | 1.21 <sup>d</sup>    | 2.71 <sup>bc</sup>   | 2.57 <sup>c</sup>    | 1.39 <sup>d</sup>    | 0.097 | <0.001          |
|                            | 6        | 2.54 <sup>ab</sup>     | 2.67 <sup>a</sup>    | 2.67 <sup>a</sup>    | 2.48 <sup>ab</sup>   | 2.38 <sup>b</sup>    | 2.38 <sup>b</sup>    | 2.41 <sup>b</sup>    | 0.055 | 0.015           |
|                            | 12       | 3.34 <sup>a</sup>      | 2.64 <sup>b</sup>    | 2.43 <sup>b</sup>    | 2.26 <sup>b</sup>    | 2.48 <sup>b</sup>    | 2.29 <sup>b</sup>    | 2.37 <sup>b</sup>    | 0.084 | 0.006           |
|                            | 24       | 2.46 <sup>b</sup>      | 2.70 <sup>a</sup>    | 2.32 <sup>bc</sup>   | 2.17 <sup>cd</sup>   | 2.12 <sup>de</sup>   | 1.96 <sup>e</sup>    | 2.32 <sup>bc</sup>   | 0.056 | <0.001          |

<sup>1</sup> CON, control; BEN, bentonite; CC, calcium carbonate; CO, calcium oxide; SB, sodium bicarbonate; SS, sodium sesquicarbonate; PC, processed coral. <sup>a-e</sup> Means in each row with different superscripts are significantly different (*p* < 0.05). SEM, standard error of the mean; NH<sub>3</sub>-N, ammonia-nitrogen; VFA, volatile fatty acid; A/P, acetate to propionate ratio.

**Table S5.** Effect of treatments on rumen fermentation profile of Holstein Friesian cows after 5 days of supplementation.

| Parameter                  | Day (d) | Treatment <sup>1</sup> |                   |                   | SEM    | <i>p</i> -value |
|----------------------------|---------|------------------------|-------------------|-------------------|--------|-----------------|
|                            |         | CON                    | RB-1              | RB-3              |        |                 |
| pH                         | 0       | 5.56                   | 5.58              | 5.93              | 0.310  | 0.704           |
|                            | 5       | 5.70 <sup>b</sup>      | 6.63 <sup>a</sup> | 6.54 <sup>a</sup> | 0.144  | 0.034           |
| NH <sub>3</sub> -N (mg/dL) | 0       | 6.57                   | 3.38              | 5.17              | 1.999  | 0.605           |
|                            | 5       | 2.53                   | 2.51              | 3.34              | 0.613  | 0.745           |
| Total VFA (mmol/L)         | 0       | 113.74                 | 123.45            | 125.59            | 12.518 | 0.839           |
|                            | 5       | 115.53                 | 126.04            | 127.09            | 7.465  | 0.653           |
| VFA (mmol/L)               |         |                        |                   |                   |        |                 |
| Acetate                    | 0       | 62.11                  | 68.18             | 70.86             | 7.501  | 0.835           |
|                            | 5       | 67.73                  | 71.42             | 77.65             | 3.646  | 0.187           |
| Propionate                 | 0       | 36.42                  | 37.55             | 37.60             | 5.012  | 0.985           |
|                            | 5       | 30.49                  | 32.41             | 31.47             | 2.686  | 0.885           |
| Butyrate                   | 0       | 15.21                  | 17.72             | 17.13             | 1.382  | 0.568           |
|                            | 5       | 16.61                  | 19.83             | 18.77             | 1.285  | 0.413           |
| A/P ratio                  | 0       | 1.76                   | 1.82              | 1.87              | 0.177  | 0.920           |
|                            | 5       | 2.05                   | 2.66              | 2.47              | 0.136  | 0.075           |

<sup>1</sup> CON, negative control; RB-1, (30% calcium oxide, 10% processed coral, 30% magnesium oxide, 30% sodium bicarbonate); RB-3, (20% calcium oxide, 10% processed coral, 40% magnesium oxide, 30% sodium bicarbonate). <sup>a-b</sup> Means in each row with different superscripts are significantly different ( $p < 0.05$ ). SEM, standard error of the mean; NH<sub>3</sub>-N, ammonia-nitrogen; A/P, acetate to propionate ratio.
